# Supplementary material
Source: PubMed Central journal article supplement (PMC5561291)
Supplement: AEM.01046-17_zam999118021s1.pdf [file AEM.01046-17_zam999118021s1.pdf]

# Supplemental Material

## Cleaning and disinfection of biofilms composed of *Listeria monocytogenes* and background microbiota from meat processing surfaces

Annette Fagerlund, Trond Møretrø, Even Heir, Romain Briandet, Solveig Langsrud

### Contents:

|                                                                                                    |          |
|----------------------------------------------------------------------------------------------------|----------|
| <b>Supplemental Tables</b> .....                                                                   | <b>2</b> |
| Table S1: Maximal growth rates and OD <sub>600</sub> values obtained from growth curves.....       | 2        |
| Table S2: Putative biofilm-associated genes identified in <i>Pseudomonas</i> sp. strains.....      | 3        |
| Table S3: Bactericidal suspension test results.....                                                | 4        |
| Table S4: Number of conveyor belt coupons subjected to CLSM imaging.....                           | 5        |
| Table S5: GenBank accessions for publicly available sequences used in phylogenetic analyses....    | 6        |
| Table S6: References used for 16S rRNA amplicon analysis in Qiime.....                             | 7        |
| <b>Supplemental Figures</b> .....                                                                  | <b>8</b> |
| FIG S1: Neighbor-joining phylogeny of strains belonging to the genus <i>Pseudomonas</i> .....      | 8        |
| FIG S2: Neighbor-joining phylogeny of strains belonging to the genus <i>Acinetobacter</i> .....    | 9        |
| FIG S3: Development of the microbiota in multigenera biofilms and planktonic cultures.....         | 10       |
| FIG S4: Competition between <i>L. monocytogenes</i> strains during biofilm and planktonic growth.. | 11       |
| FIG S5: The biovolume of <i>L. monocytogenes</i> on conveyor belt coupons.....                     | 12       |

Table S1: Maximal growth rates and OD<sub>600</sub> values obtained from growth curves

|                                | max growth rate (days <sup>-1</sup> ) | OD <sub>600</sub> in stationary phase |
|--------------------------------|---------------------------------------|---------------------------------------|
| <i>A. johnsonii</i> MF4640     | 7.6                                   | 1.2                                   |
| <i>A. johnsonii</i> MF4642     | 8.1                                   | 1.3                                   |
| <i>C. sputi</i> MF4643         | 1.3                                   | 1.0                                   |
| <i>Corynebacterium</i> MF4645  | 3.4                                   | 1.6                                   |
| <i>Epilithonimonas</i> MF6392  | 4.8                                   | 2.0                                   |
| <i>K. rhizophila</i> MF6395    | 2.6                                   | 2.0                                   |
| <i>Kocuria</i> MF4644          | 1.8                                   | 0.1 <sup>a</sup>                      |
| <i>Microbacterium</i> MF4634   | 3.3                                   | 2.3                                   |
| <i>Micrococcus</i> MF6369      | 1.3                                   | 2.0                                   |
| <i>P. fluorescens</i> MF6394   | 11.0                                  | 2.1                                   |
| <i>P. mandelii</i> MF4836      | 9.2                                   | 2.0                                   |
| <i>P. putida</i> MF6396        | 6.8                                   | 2.0                                   |
| <i>Psychrobacter</i> MF4641    | 3.8                                   | 1.5                                   |
| <i>R. erythropolis</i> MF4633  | 4.3                                   | 2.0                                   |
| <i>R. fascians</i> MF4637      | 3.6                                   | 2.0                                   |
| <i>Sphingomonas</i> MF4632     | 1.1                                   | 0.4 <sup>a</sup>                      |
| <i>L. monocytogenes</i> MF4536 | 4.5                                   | 1.0                                   |
| <i>L. monocytogenes</i> MF5376 | 4.6                                   | 1.0                                   |
| <i>L. monocytogenes</i> MF5377 | 4.5                                   | 1.0                                   |
| <i>L. monocytogenes</i> MF5634 | 4.5                                   | 1.1                                   |
| <i>L. monocytogenes</i> MF4565 | 4.6                                   | 1.1                                   |
| <i>L. monocytogenes</i> MF5378 | 4.4                                   | 1.1                                   |
| <i>L. monocytogenes</i> MF5630 | 4.5                                   | 1.0                                   |

<sup>a</sup> The strain did not reach stationary phase in 6 days. The value given is the OD<sub>600</sub> reached after six days of growth.

Table S2: Putative biofilm-associated genes identified in *Pseudomonas* sp. strains<sup>a</sup>

| <b>Polysaccharide Psl</b>                               |        |              |              |              |
|---------------------------------------------------------|--------|--------------|--------------|--------------|
| Query gene/locus tag                                    | MF4836 | MF6394       | MF6396       |              |
| <i>pslA</i>                                             | PA2231 | -            | MF6394_31135 | -            |
| <i>pslB</i>                                             | PA2232 | MF4836_12955 | MF6394_31140 | MF6396_02060 |
| <i>pslC</i>                                             | PA2233 | -            | MF6394_31145 | -            |
| <i>pslD</i>                                             | PA2234 | -            | MF6394_31150 | -            |
| <i>pslE</i>                                             | PA2235 | -            | MF6394_31155 | -            |
| <i>pslF</i>                                             | PA2236 | -            | MF6394_31160 | -            |
| <i>pslG</i>                                             | PA2237 | -            | MF6394_31165 | -            |
| <i>pslH</i>                                             | PA2238 | -            | MF6394_31170 | MF6396_02055 |
| <i>pslI</i>                                             | PA2239 | -            | MF6394_31175 | -            |
| <i>pslJ</i>                                             | PA2240 | -            | MF6394_31180 | -            |
| <i>pslK</i>                                             | PA2241 | -            | MF6394_31190 | -            |
| <i>pslL</i>                                             | PA2242 | -            | -            | -            |
| <i>pslM</i>                                             | PA2243 | MF4836_20005 | -            | MF6396_25180 |
| <i>pslN</i>                                             | PA2244 | MF4836_27720 | MF6394_16270 | MF6396_25885 |
| <b>Polysaccharide Pel</b>                               |        |              |              |              |
| Query gene/locus tag                                    | MF4836 | MF6394       | MF6396       |              |
| <i>pelA</i>                                             | PA3064 | MF4836_15930 | -            | -            |
| <i>pelB</i>                                             | PA3063 | MF4836_15935 | -            | -            |
| <i>pelC</i>                                             | PA3062 | MF4836_15940 | -            | -            |
| <i>pelD</i>                                             | PA3061 | MF4836_15945 | -            | -            |
| <i>pelE</i>                                             | PA3060 | MF4836_15950 | -            | -            |
| <i>pelF</i>                                             | PA3059 | MF4836_15955 | -            | -            |
| <i>pelG</i>                                             | PA3058 | MF4836_15960 | -            | -            |
| <b>Aggregative polysaccharide cellulose, wss operon</b> |        |              |              |              |
| Query gene                                              | MF4836 | MF6394       | MF6396       |              |
| <i>wssB</i>                                             | -      | -            | -            | MF6396_10305 |
| <i>wssC</i>                                             | -      | -            | -            | MF6396_10310 |
| <i>wssD</i>                                             | -      | -            | -            | MF6396_10315 |
| <i>wssE</i>                                             | -      | -            | -            | MF6396_10320 |
| <i>wssF</i>                                             | -      | -            | -            | MF6396_10325 |
| <i>wssG</i>                                             | -      | -            | -            | MF6396_10330 |
| <i>wssH</i>                                             | -      | MF4836_08185 | MF6394_04460 | MF6396_10335 |
| <i>wssI</i>                                             | -      | -            | -            | MF6396_10340 |
| <b>Capsular polysaccharide alginate</b>                 |        |              |              |              |
| Query gene/locus tag                                    | MF4836 | MF6394       | MF6396       |              |
| <i>algD</i>                                             | PA3540 | MF4836_08230 | MF6394_04505 | MF6396_00635 |
| <i>alg8</i>                                             | PA3541 | MF4836_08225 | MF6394_04500 | MF6396_00630 |
| <i>alg44</i>                                            | PA3542 | MF4836_08215 | MF6394_04490 | MF6396_00625 |
| <i>algK</i>                                             | PA3543 | MF4836_08210 | MF6394_04485 | MF6396_00620 |
| <i>algE</i>                                             | PA3544 | MF4836_08205 | MF6394_04480 | MF6396_00615 |
| <i>algG</i>                                             | PA3545 | MF4836_08200 | MF6394_04475 | MF6396_00610 |
| <i>algX</i>                                             | PA3546 | MF4836_08195 | MF6394_04470 | MF6396_00605 |
| <i>algL</i>                                             | PA3547 | MF4836_08190 | MF6394_04465 | MF6396_00600 |
| <i>algI</i>                                             | PA3548 | MF4836_08185 | MF6394_04460 | MF6396_00595 |
| <i>algJ</i>                                             | PA3549 | MF4836_08180 | MF6394_04455 | MF6396_00590 |
| <i>algF</i>                                             | PA3550 | MF4836_08175 | MF6394_04450 | MF6396_00585 |
| <i>algA</i>                                             | PA3551 | MF4836_08170 | MF6394_04445 | MF6396_00580 |
| <b>LapA adhesin</b>                                     |        |              |              |              |
| Query gene/locus tag                                    | MF4836 | MF6394       | MF6396       |              |
| <i>lapA</i>                                             | PP0168 | MF4836_17645 | MF6394_18190 | MF6396_24900 |
| <i>lapB</i>                                             | PP0167 | MF4836_17635 | MF6394_18180 | MF6396_22540 |
| <i>lapC</i>                                             | PP0166 | MF4836_17630 | MF6394_18175 | MF6396_22545 |
| <i>lapD</i>                                             | PP0165 | MF4836_17655 | MF6394_32135 | MF6396_24100 |
| <i>lapG</i>                                             | PP0164 | MF4836_17660 | MF6394_32130 | MF6396_24095 |

<sup>a</sup> The gene producing the highest-scoring alignment in each BLASTsearch is listed, and all matches with E-values <10<sup>-9</sup> were included in the table.

Table S3: Bactericidal suspension test results

| Strain                            | control log <sub>10</sub> CFU ml <sup>-1</sup> | log <sub>10</sub> reductions; 1% Alkalifoam | log <sub>10</sub> reductions; 1% DesQA | log <sub>10</sub> reductions; 1.5% Diverfoam |
|-----------------------------------|------------------------------------------------|---------------------------------------------|----------------------------------------|----------------------------------------------|
| <i>A. johnsonii</i> MF4640        | 7.1 7.0 4.9 6.9                                | 5.1 >5.0 2.3 >4.9                           | >5.1 4.4 >2.9 >4.9                     | >5.1 >5.0 2.9 >4.9                           |
| <i>A. johnsonii</i> sp. MF4642    | 6.8 6.7 6.8                                    | >4.8 >4.7 >4.8                              | >4.8 4.2 >4.8                          | >4.8 4.7 >4.8                                |
| <i>C. sputi</i> MF4643            | 7.0 7.0 7.0                                    | 1.6 1.1 1.2                                 | 5.0 >5.0 >5.0                          | >5.0 >5.0 >5.0                               |
| <i>Corynebacterium</i> sp. MF4645 | 7.1 6.9 7.0                                    | 1.5 1.3 1.6                                 | 5.1 >4.9 >5.0                          | >5.1 >4.9 >5.0                               |
| <i>Epilithonimonas</i> sp. MF6392 | 6.6 5.4 5.1                                    | >4.6 >3.4 3.1                               | >4.6 >3.4 >3.1                         | >4.6 >3.4 >3.1                               |
| <i>Kocuria</i> sp. MF4644         | 7.2 7.2 7.2                                    | 3.5 4.4 3.0                                 | 5.2 >5.2 >5.2                          | >5.2 >5.2 >5.2                               |
| <i>Kocuria rhizophila</i> MF6395  | 7.0 6.7 6.3                                    | 3.8 >4.7 3.7                                | 4.3 >4.7 >4.3                          | <5.0 >4.7 >4.3                               |
| <i>Microbacterium</i> sp. MF4634  | 7.0 6.9 6.9                                    | >5.0 >4.9 >4.9                              | >5.0 >4.9 >4.9                         | 4.5 >4.9 >4.9                                |
| <i>Micrococcus</i> sp. MF6393     | 6.9 6.6 6.6                                    | 1.8 1.7 1.6                                 | >4.9 >4.6 >4.6                         | >4.9 >4.6 >4.6                               |
| <i>P. putida</i> MF6396           | 7.2 7.2 6.9                                    | 3.7 3.1 4.9                                 | >5.2 >5.2 >4.9                         | >5.2 >5.2 >4.9                               |
| <i>P. fluorescens</i> MF6394      | 7.1 7.0 7.0                                    | >5.1 >5.0 4.7                               | >5.1 5.0 >5.0                          | >5.1 >5.0 >5.0                               |
| <i>P. mandelii</i> MF4836         | 7.4 7.4 7.3 7.0                                | >5.4 3.4 >5.3 >5.0                          | 5.4 3.7 >5.3 >5.0                      | >5.4 3.9 >5.3 >5.0                           |
| <i>Psychrobacter</i> sp. MF4641   | 4.6 7.3 5.2 6.4                                | ? 3.5 >3.2 >4.4                             | ? >5.3 >3.2 >4.4                       | ? >5.3 >3.2 >4.4                             |
| <i>R. erythropolis</i> MF4633     | 7.3 7.1 7.0 7.3                                | 5.3 >5.1 4.5 >5.3                           | ? >5.1 >5.0 >5.3                       | 5.3 >5.1 >5.0 >5.3                           |
| <i>R. fascians</i> MF4637         | ~7.0 6.8 7.6                                   | >5.0 >4.8 >5.6                              | >5.0 >4.8 >5.6                         | >5.0 >4.8 >5.6                               |
| <i>Sphingomonas</i> sp. MF4632    | - 6.9 6.6 6.5                                  | - 4.9 >4.6 3.7                              | - 3.6 >4.6 >4.5                        | - >4.9 >4.6 >4.5                             |
| <i>L. monocytogenes</i> MF4536    | 7.2 7.0 7.1                                    | >5.2 >5.0 >5.1                              | >5.2 >5.0 >5.1                         | >5.2 >5.0 >5.1                               |
| <i>L. monocytogenes</i> MF5376    | 7.2 7.2 7.1                                    | 5.2 >5.2 3.6                                | >5.2 >5.2 >5.1                         | >5.2 >5.2 4.4                                |
| <i>L. monocytogenes</i> MF5634    | 7.2 7.1 7.3                                    | 5.2 >5.1 >5.3                               | 3.8 >5.1 >5.3                          | >5.2 >5.1 >5.3                               |
| <i>L. monocytogenes</i> MF5377    | 7.2 7.2 7.2                                    | 4.6 >5.2 >5.2                               | >5.2 >5.2 >5.2                         | >5.2 >5.2 >5.2                               |
| <i>L. monocytogenes</i> MF4565    | 7.4 7.2 7.3                                    | >5.4 >5.2 4.6                               | >5.4 >5.2 >5.3                         | >5.4 >5.2 >5.3                               |
| <i>L. monocytogenes</i> MF5630    | 7.1 7.1 7.1 7.0                                | >5.1 >5.1 3.3 >5.0                          | >5.1 >5.1 3.4 >5.0                     | >5.1 >5.1 3.2 >5.0                           |
| <i>L. monocytogenes</i> MF5378    | 7.3 7.1 7.3 7.1                                | >5.3 >5.1 3.3 5.1                           | >5.3 >5.1 ~3.3 >5.1                    | >5.3 >5.1 ~3.3 >5.1                          |

Table S4: Number of conveyor belt coupons subjected to CLSM imaging <sup>a</sup>

| <b>Front of coupon</b>           |       | <b>Before C&amp;D</b> |            | <b>After C&amp;D</b> |            |
|----------------------------------|-------|-----------------------|------------|----------------------|------------|
|                                  |       | <b>H<sub>2</sub>O</b> | <b>QAC</b> | <b>QAC</b>           | <b>PAA</b> |
| Multigenera biofilms             | Day 4 | 5 (21)                | NA         | 5 (20)               | 3 (15)     |
|                                  | Day 7 | 5 (15)                | 5 (15)     | 5 (15)               | NT         |
| <i>L. monocytogenes</i> biofilms | Day 4 | 5 (22)                | NA         | 1 (5)                | 1 (5)      |
|                                  | Day 7 | 5 (15)                | NT         | NT                   | NT         |
| <b>Back of coupon</b>            |       |                       |            |                      |            |
| Multigenera biofilms             | Day 4 | 3 (15)                | NA         | 3 (10)               | 1 (3)      |
|                                  | Day 7 | 5 (15)                | 5 (15)     | 5 (15)               | NT         |
| <i>L. monocytogenes</i> biofilms | Day 4 | 3 (11)                | NA         | 2 (6)                | NT         |
|                                  | Day 7 | 5 (15)                | 5 (15)     | 2 (6)                | NT         |

<sup>a</sup> The total number of Z-scans acquired for each set of coupons is given in parenthesis. NA: not applicable. NT: not tested

Table S5: GenBank accessions for publicly available sequences used in phylogenetic analyses

| Strain (type strain of the species unless strain name is listed) | Accession numbers for sequences used in phylogenetic analysis |             |             |             |              |
|------------------------------------------------------------------|---------------------------------------------------------------|-------------|-------------|-------------|--------------|
|                                                                  | 16S rRNA                                                      | <i>gyrB</i> | <i>rpoB</i> | <i>rpoD</i> | WGS          |
| <i>Pseudomonas aeruginosa</i>                                    | HE978271                                                      | AJ633104    | AJ717442    | AB039607    |              |
| <i>P. alkylphenolia</i> KL28                                     |                                                               |             |             |             | CP009048     |
| <i>P. antarctica</i>                                             | AJ537601                                                      | FN554169    | FN554727    | FN554450    |              |
| <i>P. arsenicoxydans</i>                                         | FN645213                                                      | HE800469    | HE800503    | HE800488    |              |
| <i>P. aureofaciens</i>                                           | AY509898                                                      | FN554172    | AJ717426    | FN554453    |              |
| <i>P. azotoformans</i>                                           | D84009                                                        | AB039411    | AJ717458    | AB039547    |              |
| <i>P. corrugata</i>                                              | D84012                                                        | AB039460    | AJ717487    | AB039566    |              |
| <i>P. costantinii</i>                                            | AF374472                                                      | FN554180    | FN554732    | FN554461    |              |
| <i>P. cremoricolorata</i>                                        | AB060137                                                      | FN554181    | AJ717476    | FN554462    |              |
| <i>P. donghuensis</i>                                            |                                                               |             |             |             | AJJP00000000 |
| <i>P. entomophila</i>                                            | AY907566                                                      | AY907567    |             |             | CT573326     |
| <i>P. extremorientalis</i>                                       | AF405328                                                      | FN554182    | FN554733    | FN554464    |              |
| <i>P. fluorescens</i>                                            | D84013                                                        | D86016      | AJ717451    | AB039545    |              |
| <i>P. fluorescens</i> A506                                       |                                                               |             |             |             | CP003041     |
| <i>P. fluorescens</i> FW300-N2E3                                 |                                                               |             |             |             | CP012830     |
| <i>P. fluorescens</i> Pt14                                       |                                                               |             |             |             | CP017296     |
| <i>P. fragi</i>                                                  | AF094733                                                      | FN554184    | AJ717444    | FN554466    |              |
| <i>P. frederiksbergensis</i>                                     | AJ249382                                                      | AM084676    | AJ717465    | AM084335    |              |
| <i>P. fulva</i>                                                  | AB060136                                                      | AB039395    | AJ717419    | AB039586    |              |
| <i>P. gessardii</i>                                              | AF074384                                                      | FN554186    | AJ717438    | FN554468    |              |
| <i>P. grimontii</i>                                              | AF268029                                                      | FN554188    | AJ717439    | FN554470    |              |
| <i>P. japonica</i>                                               | AB126621                                                      | GQ996725    | HE577800    | HE577795    |              |
| <i>P. libanensis</i>                                             | AF057645                                                      | FN554195    | AJ717454    | FN554477    |              |
| <i>P. lini</i>                                                   | AY035996                                                      | FN554196    | AJ717466    | FN554478    |              |
| <i>P. lutea</i>                                                  | AY364537                                                      | FN554198    | FN554738    | FN554480    |              |
| <i>P. mandelii</i>                                               | AF058286                                                      | FN554200    | AJ717435    | FN554482    |              |
| <i>P. marginalis</i>                                             | Z76663                                                        | AB039448    | AJ717425    | AB039575    |              |
| <i>P. migulae</i>                                                | AF074383                                                      | FN554204    | AJ717446    | FN554486    |              |
| <i>P. montellii</i>                                              | AF064458                                                      | FN554205    | AJ717455    | FN554488    |              |
| <i>P. mosselii</i>                                               | AF072688                                                      | FN554207    | FN554744    | FN554491    |              |
| <i>P. orientalis</i>                                             | AF064457                                                      | FN554209    | AJ717434    | FN554493    |              |
| <i>P. palleroniana</i>                                           | AY091527                                                      | FN554213    | FN554747    | FN554497    |              |
| <i>P. parafulva</i>                                              | AB060132                                                      | FN554216    | AJ717471    | FN554500    |              |
| <i>P. plecoglossicida</i>                                        | AB009457                                                      | FN554218    | AJ717456    | FN554503    |              |
| <i>P. poae</i>                                                   | AJ492829                                                      | FN554219    | FN554751    | FN554504    |              |
| <i>P. protegens</i>                                              | AJ278812                                                      | HE800482    | HE800514    |             | CP003190     |
| <i>P. putida</i>                                                 | D84020                                                        | AB039451    |             | AB039581    | AP013070     |
| <i>P. rhizosphaerae</i>                                          | AY152673                                                      | FN554224    | FN554755    | FN554510    |              |
| <i>P. rhodesiae</i>                                              | AF064459                                                      | FN554225    | AJ717431    | FN554511    |              |
| <i>P. synxantha</i>                                              | D84025                                                        | AB039415    | AJ717420    | AB039550    |              |
| <i>P. syringae</i>                                               | DQ318866                                                      | AB039428    | FN554759    | AB039516    |              |
| <i>P. tolaasii</i>                                               | AF255336                                                      | AB039423    | AJ717467    | AB039561    |              |
| <i>P. trivialis</i>                                              | AJ492831                                                      | FN554230    | FN554762    | FN554515    |              |
| <i>P. veronii</i>                                                | AF064460                                                      | FN554233    | AJ717445    | FN554518    |              |
| <i>P. vranovensis</i>                                            | AY970951                                                      | HE577791    | HE577799    | HE577793    |              |
| <i>Cellvibrio japonicus</i> Ueda107                              |                                                               |             |             |             | CP000934     |
| <i>Acinetobacter johnsonii</i>                                   |                                                               |             |             |             | APON00000000 |
| <i>A. schindleri</i>                                             |                                                               |             |             |             | APPQ00000000 |
| <i>A. baylyi</i>                                                 |                                                               |             |             |             | APPT00000000 |
| <i>A. townneri</i>                                               |                                                               |             |             |             | APPY00000000 |
| <i>A. johnsonii</i> ANC 3681                                     |                                                               |             |             |             | APPZ00000000 |
| <i>A. bouvetii</i>                                               |                                                               |             |             |             | APQD00000000 |
| <i>A. baumannii</i>                                              |                                                               |             |             |             | APRG00000000 |
| <i>A. indicus</i>                                                |                                                               |             |             |             | AYET00000000 |
| <i>A. lwoffii</i>                                                |                                                               |             |             |             | AYHO00000000 |
| <i>Psychrobacter</i> sp. PRwf-1                                  |                                                               |             |             |             | CP000713     |

## Table S6 References used for 16S rRNA amplicon analysis in Qiime

The 17 partial 16S rRNA (V3-V4) gene sequences of the 16 background flora strains plus *L. monocytogenes* used in experiments in the current study. This sequence file was used as the reference database to identify the different taxa in the Qiime analysis.

>P-putida-MF6396  
TGGGGAATATTGGACAATGGGCGAAAGCCTGATCCAGCCATGCCCGTGTGTGAAGAAGTCTTCGATTGAAAGCACTTAAAGTTGGGAGGAAGGGCAGTAAGCAATACCTTGCTGTTTACGTTACCG  
ACAGAAATAGCACCGGCTAACTCTGTGCCAGCAGCCGCGTAATACAGAGGGTGAAGCGTTAATCGGAATTACTGGGCGTAAAGCGCGTAGGTGGTTCTGTTAAGTTGGATGTGAAATCCCGGGCTCAAC  
CTGGGAACCTGATCCAAACTGGCAGCTAGAGTAGGGCAGAGGGTGGTGAATTTCTGTGTAGCGGTGAAATGCGTAGATATAGGAAGGAACACCACTGGCGAAGGGCACCACCTGGGCTCATAGTACA  
CTGAGGTGCGAAAGCTGGGGAGCAAAACA  
>P-fluorescens-MF6394  
TGGGGAATATTGGACAATGGGCGAAAGCCTGATCCAGCCATGCCCGTGTGTGAAGAAGTCTTCGATTGAAAGCACTTAAAGTTGGGAGGAAGGGTGTAGATTAATACTCTGCAATTTTTCGTTACCGCA  
CAGAAATAGCACCGGCTAACTCTGTGCCAGCAGCCGCGTAATACAGAGGGTGAAGCGTTAATCGGAATTACTGGGCGTAAAGCGCGTAGGTGGTTTGTAAAGTTGGATGTGAAATCCCGGGCTCAACC  
TGGGAACCTGATCCAAACTGGGAAGCTAGAGTAGAGTGGTGGTGAATTTCTGTGTAGCGGTGAAATGCGTAGATATAGGAAGGAACACCACTGGCGAAGGGCACCACCTGGACTAATACTGACACT  
GAGGTGCGAAAGCTGGGGAGCAAAACA  
>L-monocytogenes  
TAGGGAATCTTCGCAATGGACGAAAGTCTGACGGAGCAACCGCGTGTATGAAGAAGTCTTCGATTGAAAGTACTGTTGTTAGAGAAGAACAAGGATAAGAGTAAGTCTGTTGCTTTCGAGGTTACTA  
ACCAGAAAGCCAGCGTAACTCTGTGCCAGCAGCCGCGTAATACAGAGGGTGAAGCGTTAATCGGAATTACTGGGCGTAAAGCGCGTAGGTGGTTTGTAAAGTTGGATGTGAAATCCCGGGCTCAACC  
GGGAGGGTCTATGGAAACTGGGAAGCTAGAGTAGGAGGGTGGTGAATTTCTGTGTAGCGGTGAAATGCGTAGATATAGGAAGGAACACCACTGGCGAAGGGCACCACCTGGACTAATACTGACACT  
CTGAGGCGAAAGCTGGGGAGCAAAACA  
>Acinetobacter-MF4640  
TGGGGAATATTGGACAATGGGCGAAAGCCTGATCCAGCCATGCCCGTGTGTGAAGAAGTCTTCGATTGAAAGCACTTAAAGCGAGGAGGAGGCTACCGAGATTAATACTCTAGGATAGTGGACGTTACT  
CGCAGAAATAGCACCGGCTAACTCTGTGCCAGCAGCCGCGTAATACAGAGGGTGAAGCGTTAATCGGAATTACTGGGCGTAAAGCGCGTAGGTGGTTTGTAAAGTTGGATGTGAAATCCCGGGCTCAACC  
TTAGGAATTGCATTCGATACTGGGAAGCTAGAGTAGGAGGGTGGTGAATTTCTGTGTAGCGGTGAAATGCGTAGATATAGGAAGGAACACCACTGGCGAAGGGCACCACCTGGACTAATACTGACACT  
CTGAGGCGAAAGCTGGGGAGCAAAACA  
>Acinetobacter-MF4642  
TGGGGAATATTGGACAATGGGCGCAAGCCTGATCCAGCCATGCCCGTGTGTGAAGAAGTCTTCGATTGAAAGCACTTAAAGCGAGGAGGAGGCTACTTGGATTAATACTCTAGGATAGTGGACGTTACT  
GCAGAAATAGCACCGGCTAACTCTGTGCCAGCAGCCGCGTAATACAGAGGGTGAAGCGTTAATCGGAATTACTGGGCGTAAAGCGCGTAGGTGGTTTGTAAAGTTGGATGTGAAATCCCGGGCTCAACC  
TAGGAATTGCATTCGATACTGGGAAGCTAGAGTAGGAGGGTGGTGAATTTCTGTGTAGCGGTGAAATGCGTAGATATAGGAAGGAACACCACTGGCGAAGGGCACCACCTGGACTAATACTGACACT  
CTGAGGTACGAAGCATGGGGAGCAAAACA  
>Acinetobacter-MF4642  
TGGGGAATATTGGACAATGGGCGCAAGCCTGATCCAGCCATGCCCGTGTGTGAAGAAGTCTTCGATTGAAAGCACTTAAAGCGAGGAGGAGGCTACTTGGATTAATACTCTAGGATAGTGGACGTTACT  
GCAGAAATAGCACCGGCTAACTCTGTGCCAGCAGCCGCGTAATACAGAGGGTGAAGCGTTAATCGGAATTACTGGGCGTAAAGCGCGTAGGTGGTTTGTAAAGTTGGATGTGAAATCCCGGGCTCAACC  
TAGGAATTGCATTCGATACTGGGAAGCTAGAGTAGGAGGGTGGTGAATTTCTGTGTAGCGGTGAAATGCGTAGATATAGGAAGGAACACCACTGGCGAAGGGCACCACCTGGACTAATACTGACACT  
CTGAGGTACGAAGCATGGGGAGCAAAACA  
>P-mandelii-MF4836  
TGGGGAATATTGGACAATGGGCGAAAGCCTGATCCAGCCATGCCCGTGTGTGAAGAAGTCTTCGATTGAAAGCACTTAAAGTTGGGAGGAAGGGCAGTTACCTAATACGTTAGTTTTCGTTACCGCA  
CAGAAATAGCACCGGCTAACTCTGTGCCAGCAGCCGCGTAATACAGAGGGTGAAGCGTTAATCGGAATTACTGGGCGTAAAGCGCGTAGGTGGTTTGTAAAGTTGGATGTGAAATCCCGGGCTCAACC  
TGGGAACCTGATCCAAACTGGGAAGCTAGAGTAGGAGGGTGGTGAATTTCTGTGTAGCGGTGAAATGCGTAGATATAGGAAGGAACACCACTGGCGAAGGGCACCACCTGGACTAATACTGACACT  
CTGAGGTACGAAGCATGGGGAGCAAAACA  
>Psychrobacter-MF4641  
TGCCCGTGTGTGAAGAAGCCTTTGTTGTTAAAGCACTTAAAGCACTGATCCAGCCATGCCCGTGTGTGAAGAAGTCTTCGATTGAAAGCACTTAAAGCGAGGAGGAGGCTACTTGGATTAATACTCTAGGATAGTGGACGTTACT  
GCAGAAATAGCACCGGCTAACTCTGTGCCAGCAGCCGCGTAATACAGAGGGTGAAGCGTTAATCGGAATTACTGGGCGTAAAGCGCGTAGGTGGTTTGTAAAGTTGGATGTGAAATCCCGGGCTCAACC  
TAGGAATTGCATTCGATACTGGGAAGCTAGAGTAGGAGGGTGGTGAATTTCTGTGTAGCGGTGAAATGCGTAGATATAGGAAGGAACACCACTGGCGAAGGGCACCACCTGGACTAATACTGACACT  
CTGAGGTACGAAGCATGGGGAGCAAAACA  
>R-erythropolis-MF4633  
CGCGTGAGGATGACCGCTTCGGGTTGTTAAACCTCTTCAGCAGGAGCAAGCGCAAGTACGCGTACCTGCAGAAAGCAAGCCGCTAACTACGTTGCCAGCAGCCGCGTAATACGTTAGGTTGCAAGCGGT  
AATACAGAGGGTGAAGCGTTAATCGGAATTACTGGGCGTAAAGCGAGCGTAGGTGGCTGATAAGTCAGATGTGAAAGCGCGGCTAACCTGGGAACCGCATCTGATACTGTAGGCTAGAGTAGGTA  
GAGGAAGGTAGAATTCAGGTTGATCGGTGAAATGCGTAGAGACTCTGAGGAATACCGATGGCGAAGGCAGCCTCTGGCATCACTGACACTGAGTTTCAAAGCGTGGTAGCAAAACA  
>R-erythropolis-MF4633  
CGCGTGAGGATGACCGCTTCGGGTTGTTAAACCTCTTCAGCAGGAGCAAGCGCAAGTACGCGTACCTGCAGAAAGCAAGCCGCTAACTACGTTGCCAGCAGCCGCGTAATACGTTAGGTTGCAAGCGGT  
AATACAGAGGGTGAAGCGTTAATCGGAATTACTGGGCGTAAAGCGAGCGTAGGTGGCTGATAAGTCAGATGTGAAAGCGCGGCTAACCTGGGAACCGCATCTGATACTGTAGGCTAGAGTAGGTA  
GAGGAAGGTAGAATTCAGGTTGATCGGTGAAATGCGTAGAGACTCTGAGGAATACCGATGGCGAAGGCAGCCTCTGGCATCACTGACACTGAGTTTCAAAGCGTGGTAGCAAAACA  
>R-fascians-MF4637  
GCGACCGCGTGAAGGATGAAGGCTTCGGGTTGTTAAACCTCTTCAGCAGGAGCAAGCGTAGTGACGTTACCTGCAGAAAGCAAGCCGCTAACTACGTTGCCAGCAGCCGCGTAATACGTTAGGTTGCAAGCGGT  
GAGCGTTGTCGGGAATTACTGGGCGTAAAGAGTTCGTAGGCGGTTTGTCCGCTGTTGTGAAAACCCAGAGCTCAACTCTGGGCGTGAAGCGGATACGGGCAGACTTGAATTCGAGTTGATGAGTTGATG  
CCTGTGTAGCGGTGAATGCGCAGATATCAGGAGGAACACCGGTGGCGAAGGGCGGTCTCTGGCAGTAACTGACGCTGAGGAACCAAGCGTGGTAGCAAAACA  
>Sphingomonas-MF4632  
ATGCCCGTGAAGTGAAGGCTTAGGGTTGTTAAAGCTCTTTTACCCTGATGATAATGACAGTACCGGGAGAATAAGTCCGGTAACTCGTCCAGCAGCCGCGTAATACGTTAGGTTGCAAGCGGT  
TCGGGAATTAAGGCGTAAAGAGTTCGTAGGCGGTTTGTCCGCTGTTGTGAAAACCCAGAGCTCAACTCTGGGCGTGAAGCGGATACGGGCAGACTTGAATTCGAGTTGATGAGTTGATGAGTTGATG  
AGGTGAATTCGATGATATTCGGAAGAACACCACTGGCGAAGGGCGGTGACTGGACATGATTGACGCTGAGGTGCGAAAGCGTGGGGAGCAAAACA  
>C-sputi-MF4643  
GCAGCGACCGCGTGGGGATGAAGGCTTCGGGTTGTTAAACCTCTTCATCATGACGAAAGGCTCACTGTTGTTGGGTTGACGTTAGTGGAGAAGAAGCACCGGCTAACTACGTTGCCAGCAGCCGCGTA  
TAATACGTTAGGTTGCGAGGCTGTCCGGAATTAAGGCGTAAAGAGTTCGTAGGCGGTTTGTCCGCTGTTGTGAAAACCCAGAGCTCAACTCTGGGCGTGAAGCGGATACGGGCAGACTTGAATTCGAGTTGATG  
AGGTGAATTCGATGATATTCGGAAGAACACCACTGGCGAAGGGCGGTGACTGGACATGATTGACGCTGAGGTGCGAAAGCGTGGGGAGCAAAACA  
>C-variabile-MF4645  
GCAGCGACCGCGTGGGGATGAAGGCTTCGGGTTGTTAAACCTCTTCAGCAGGAGCAAGCGTAGTGACGTTAGTGTGAGAAGAAGCACCGGCTAACTACGTTGCCAGCAGCCGCGTAATACGTTAGGTTG  
TGCAGCGTTGTCGGGAATTAAGGCGTAAAGAGTTCGTAGGCGGTTTGTCCGCTGTTGTGAAAACCCAGAGCTCAACTCTGGGCGTGAAGCGGATACGGGCAGACTTGAATTCGAGTTGATGAGTTGATG  
AGGTGAATTCGATGATATTCGGAAGAACACCACTGGCGAAGGGCGGTGACTGGACATGATTGACGCTGAGGTGCGAAAGCGTGGGGAGCAAAACA  
>Microbacterium-MF4634  
GCAGCAACCGCGTGAAGGATGACGGCTTCGGGTTGTTAAACCTCTTCAGCAGGAGCAAGCGTAAAGTACGCGTACCTGCAGAAAGCGCGGCTAACTACGTTGCCAGCAGCCGCGTAATACGTTAGGTTG  
CGCAAGCGTTATCCGGAATTAAGGCGTAAAGAGTTCGTAGGCGGTTTGTCCGCTGTTGTGAAAACCCAGAGCTCAACTCTGGGCGTGAAGCGGATACGGGCAGACTTGAATTCGAGTTGATGAGTTGATG  
ATTCTGGTGTAGCGGTGAAATGCGCAGATATCAGGAGGAACACCGATGGCGAAGGCAGGTCTCTGGCAGTTACTGACGCTGAGGAGCGAAAGCATGGGTAGCGAAACA  
>Kocuria-MF6395  
GCAGCGACCGCGTGAAGGATGACGGCTTCGGGTTGTTAAACCTCTTCAGCAGGAGCAAGCGTAAAGTACGCGTACCTGCAGAAAGCGCGGCTAACTACGTTGCCAGCAGCCGCGTAATACGTTAGGTTG  
CGCAAGCGTTGTCGGGAATTAAGGCGTAAAGAGTTCGTAGGCGGTTTGTCCGCTGTTGTGAAAACCCAGAGCTCAACTCTGGGCGTGAAGCGGATACGGGCAGACTTGAATTCGAGTTGATGAGTTGATG  
AATTCGTTGATGAGCGGTGAAATGCGCAGATATCAGGAGGAACACCGATGGCGAAGGCAGGTCTCTGGCAGTTACTGACGCTGAGGAGCGAAAGCATGGGTAGCGAAACA  
>Kocuria-MF4644  
GCAGCGACCGCGTGAAGGATGACGGCTTCGGGTTGTTAAACCTCTTCAGCAGGAGCAAGCGTAAAGTACGCGTACCTGCAGAAAGCGCGGCTAACTACGTTGCCAGCAGCCGCGTAATACGTTAGGTTG  
CGCAAGCGTTGTCGGGAATTAAGGCGTAAAGAGTTCGTAGGCGGTTTGTCCGCTGTTGTGAAAACCCAGAGCTCAACTCTGGGCGTGAAGCGGATACGGGCAGACTTGAATTCGAGTTGATGAGTTGATG  
AATTCGTTGATGAGCGGTGAAATGCGCAGATATCAGGAGGAACACCGATGGCGAAGGCAGGTCTCTGGCAGTTACTGACGCTGAGGAGCGAAAGCATGGGTAGCGAAACA  
>Micrococcus-MF6369  
GTGAGGATGACGGCTTCGGGTTGTTAAACCTCTTCAGTAGGAGCAAGCGTAAAGTACGCGTACCTGCAGAAAGCGCGGCTAACTACGTTGCCAGCAGCCGCGTAATACGTTAGGTTGCGAGCTTATC  
CGGAATTAAGGCGTAAAGAGTTCGTAGGCGGTTTGTCCGCTGTTGTGAAAACCCAGAGCTCAACTCTGGGCGTGAAGCGGATACGGGCAGACTTGAATTCGAGTTGATGAGTTGATGAGTTGATG  
CGGTGGAATGCGCAGATATCAGGAGGAACACCGATGGCGAAGGCAGGTCTCTGGCAGTTACTGACGCTGAGGAGCGAAAGCATGGGTAGCGAAACA  
>Epilithonimonas-MF6392  
TCCCGGTGAAGGACTAAGCCCTTAGGGTTGTTAAACCTCTTTACTAGGATAAACTACTACGTTGAAGTAGTGAAGGTACAGTATGAAATAGCACCGGCTAACTCCGTGCCAGCAGCCGCGTAATACG  
GAGGTGCAAGCGTTATCCGGAATTAAGGCGTAAAGAGTTCGTAGGCGGTTTGTCCGCTGTTGTGAAAACCCAGAGCTCAACTCTGGGCGTGAAGCGGATACGGGCAGACTTGAATTCGAGTTGATGAGTTGATG  
TGGAAATAGTGTAGCGGTGAAATGCGCAGATATCAGGAGGAACACCGATGGCGAAGGCAGGTCTCTGGCAGTTACTGACGCTGAGGAGCGAAAGCATGGGTAGCGAAACA

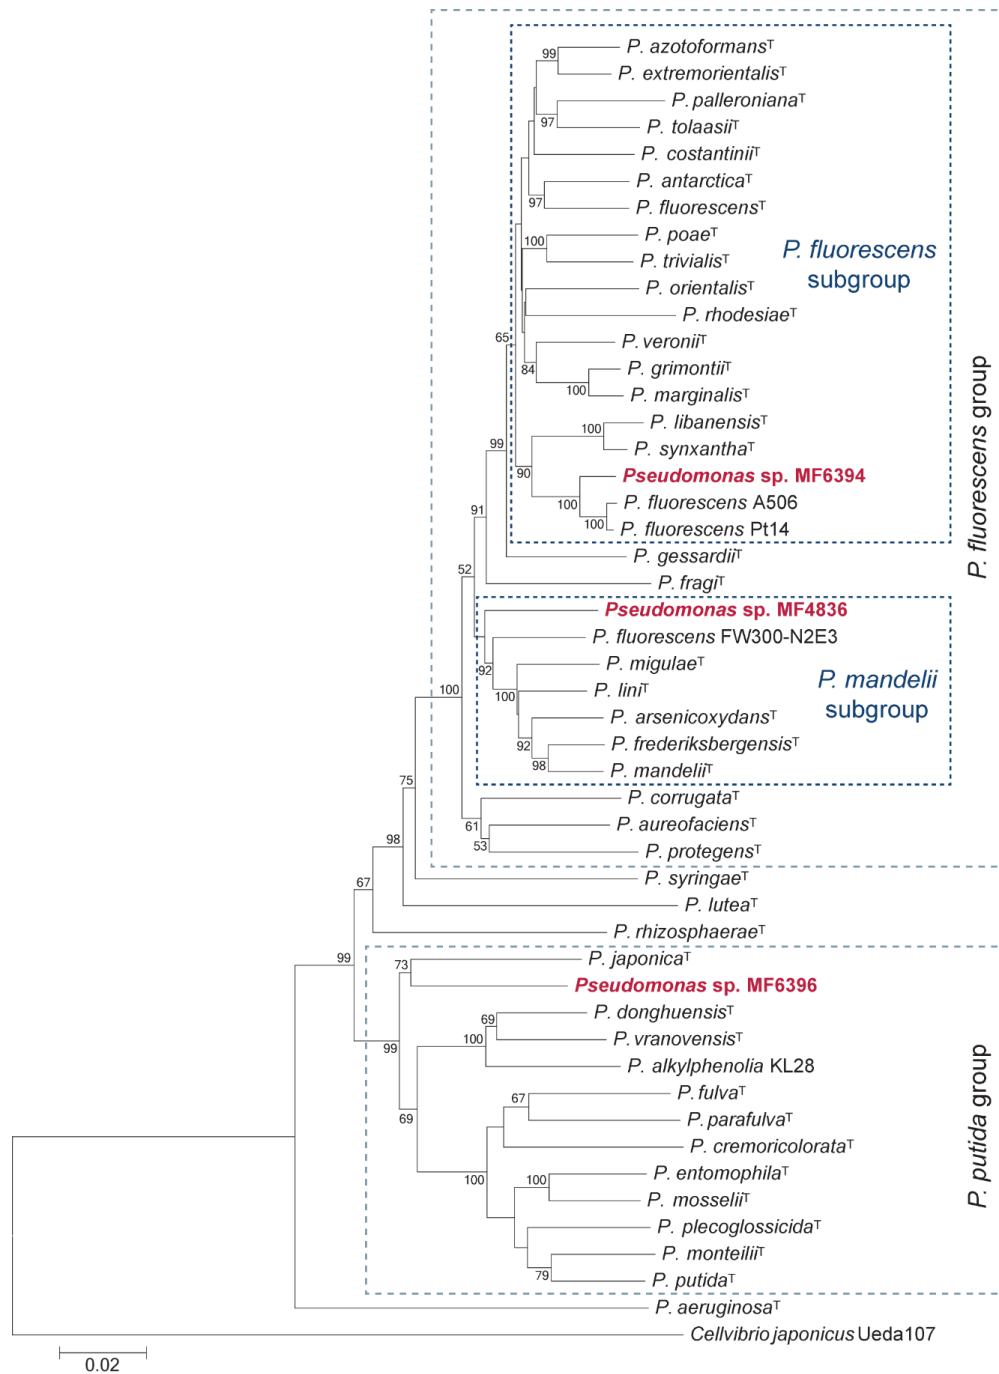

FIG S1

**Neighbor-joining phylogeny of strains belonging to the genus *Pseudomonas*.** The tree is based on concatenated partial 16S rRNA, *gyrB*, *rpoB*, and *rpoD* gene sequences, and *Cellvibrio japonicus* Ueda107 was used as an outgroup. The strains sequenced in the current study are in red bold. Type strains are indicated by superscript T. Evolutionary distances were computed with MEGA (version 7) using the Jukes-Cantor method. The bar indicates the number of base substitutions per site. Percentage bootstrap values above 50% (from 1000 replicates) are shown next to the nodes.



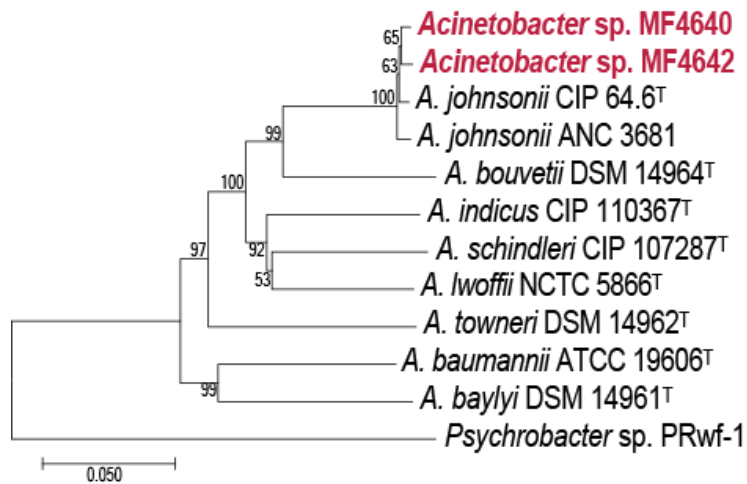

FIG S2

**Neighbor-joining phylogeny of strains belonging to the genus *Acinetobacter*.** The tree is based on concatenated partial *cpn60*, *fusA*, *gltA*, *pyrG*, *recA*, *rplB* and *rpoB* gene sequences according to the MLST scheme described by Diancourt *et al.* (1). *Psychrobacter* sp. PRwf-1 was used as an outgroup. The strains sequenced in the current study are in red bold. Type strains are indicated by superscript T. Evolutionary distances were computed with MEGA (version 7) using the Jukes-Cantor method. The bar indicates the number of base substitutions per site. Percentage bootstrap values above 50% (from 1000 replicates) are shown next to the nodes.

1. **Diancourt L, Passet V, Nemec A, Dijkshoorn L, Brisse S.** 2010. The population structure of *Acinetobacter baumannii*: expanding multiresistant clones from an ancestral susceptible genetic pool. PLoS One 5:e10034.

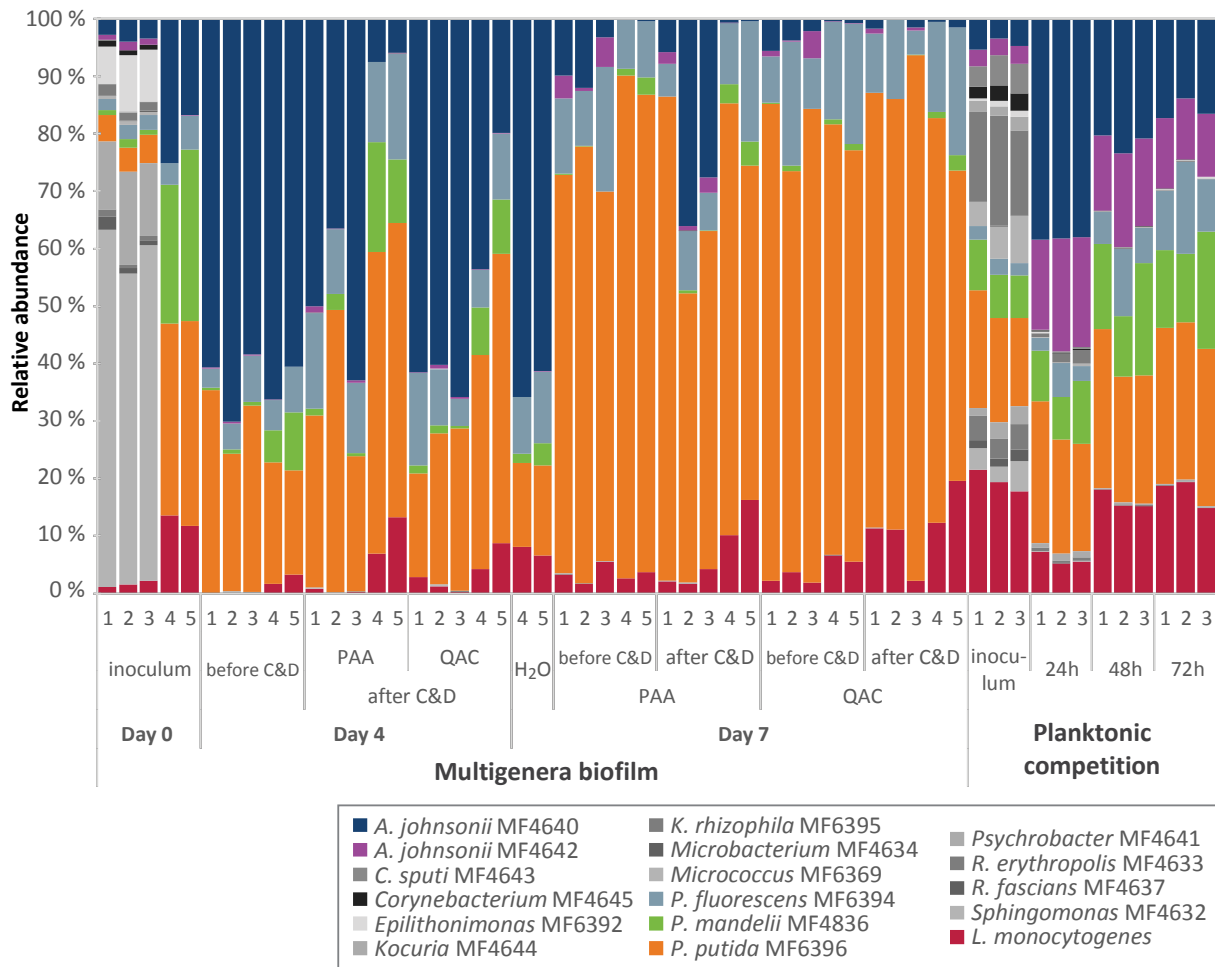

FIG S3

**Development of the microbiota in multigenera biofilms and planktonic cultures, showing results from individual experiments.** Numbers 1 to 5 below each column refer to experiment number. The frequencies of different bacterial strains was determined by 16S rRNA amplicon sequencing. Multigenera biofilms were grown on conveyor belt coupons, and inoculated with *L. monocytogenes* plus either 16 (experiments 1 to 3) or four (experiments 4 and 5) background microbiota strains. The biofilms were allowed to develop for four days before being subjected to daily cleaning with Alkalifoam and disinfection with either a QAC-based or a PAA-based disinfection agent. Coupons were harvested either before or after C&D on the day of harvest, as indicated. Planktonic competition cultures were inoculated with *L. monocytogenes* plus 16 background microbiota strains and grown with shaking in Erlenmeyer flasks for a total of 72 h. All samples were grown in BHI broth at 12°C.

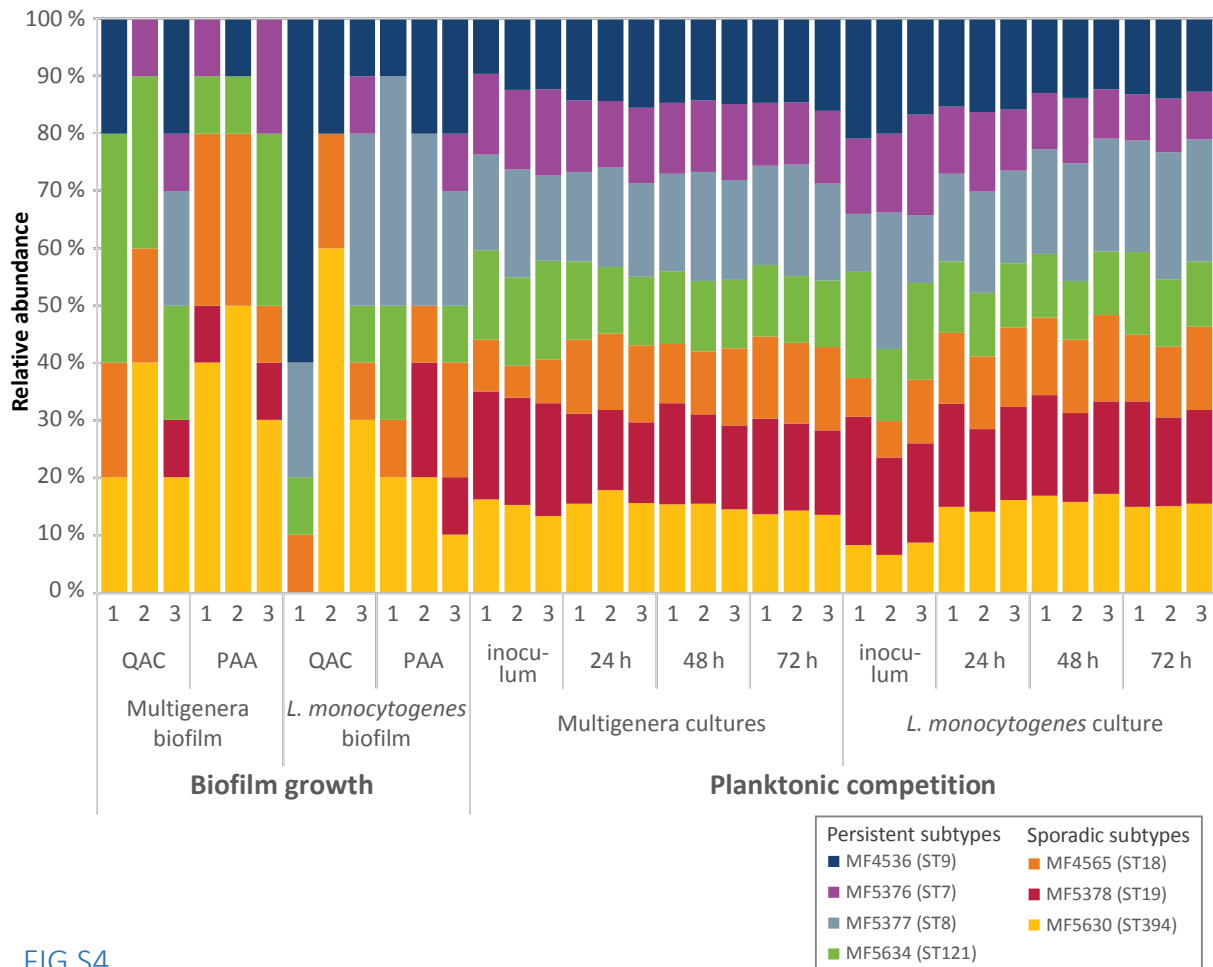

FIG S4

**Competition between *L. monocytogenes* strains during biofilm and planktonic growth,**

showing results from individual experiments. Numbers 1 to 3 below each column refer to experiment number. Inoculated suspensions were composed of equal amounts of seven different *L. monocytogenes* strains, grown either together with 16 background microbiota strains (multigenera biofilm/culture) or alone (*L. monocytogenes* biofilm/culture). Results for biofilm growth shows frequencies of *L. monocytogenes* strains surviving in biofilms on conveyor belt coupons. Biofilms were allowed to develop for four days and then subjected to daily cleaning with Alkalifoam and disinfection with either a QAC-based or a PAA-based disinfection agent on four consecutive days before harvest. The identity of single colonies of *L. monocytogenes* was determined by Sanger sequencing of the *dapE* allele. Results in each column correspond to results for ten single *L. monocytogenes* colonies identified in one experiment. Planktonic competition cultures show the relative abundance of *L. monocytogenes* strains in time-course experiments, where cultures were grown with shaking in Erlenmeyer flasks for a total of 72 h. The frequencies of different *L. monocytogenes* strains was determined by *dapE* amplicon sequencing.

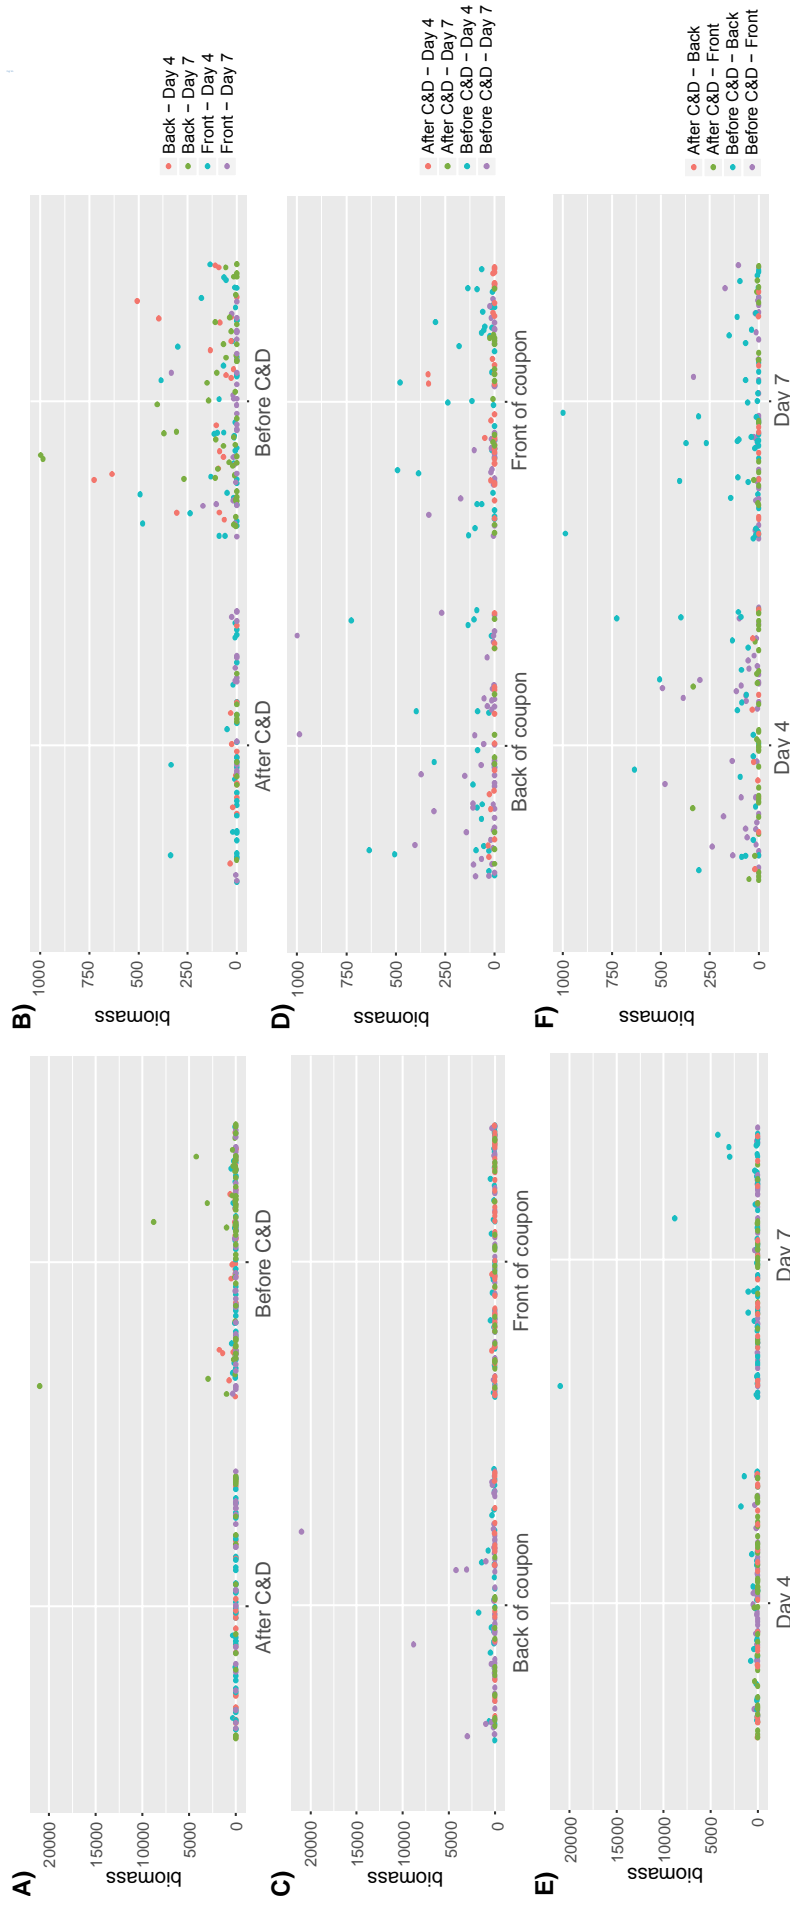

FIG S5

**The biovolume of *L. monocytogenes* on conveyor belt coupons.** The data is presented as beeswarm plots showing each individual measurement of biomass obtained from CLSM Z-scans. A) and B) shows the data grouped by samples collected before and after C&D; C) and D) compares the biomass measurements obtained on the front versus the back of coupons, while E) and F) compares samples collected after 4 and 7 days of biofilm growth. The same data is shown in A) and B), in C) and D), and in E) and F), respectively, except that the y-axis scale is different and only measurements of total volume of biomass  $\leq 1000 \mu\text{m}^3$  per scan are presented in B), D), and F). Different colored points represent different samples as listed in the legends to the right of each pair of graphs.
